# Supplementary material
Source: PubMed Central journal article supplement (PMC7265823)
Supplement: mmc1.pdf [file mmc1.pdf]

**Supplemental Table 1.** Downregulated protein expression in BRSV-infected bTECs

| Description                                                       | Gene Symbol | Accession | Fold change |
|-------------------------------------------------------------------|-------------|-----------|-------------|
| Sodium- and chloride-dependent GABA transporter 2                 | SLC6A13     | A5PJX7    | 0,555       |
| Active breakpoint cluster region-related protein                  | ABR         | A6QNS3    | 0,541       |
| Solute carrier family 2, facilitated glucose transporter member 1 | SLC2A1      | P27674    | 0,538       |
| NADH dehydrogenase [ubiquinone] 1 beta subcomplex subunit 7       | NDUFB7      | Q02368    | 0,536       |
| NADPH--cytochrome P450 reductase                                  | POR         | P04175    | 0,521       |
| GPI transamidase component PIG-S                                  | PIGS        | Q3SZL5    | 0,478       |
| Intercellular adhesion molecule 1                                 | ICAM1       | Q95132    | 0,118       |
| Estrogen receptor beta                                            | ESR2        | Q9XSB5    | 0,01        |
| Monocarboxylate transporter 1                                     | SLC16A1     | Q3MHW6    | 0,01        |
| Protein OS-9                                                      | OS9         | Q3MHX6    | 0,01        |
| Translation initiation factor eIF-2B subunit beta                 | EIF2B2      | Q5E9B4    | 0,01        |
| Inhibitor of nuclear factor kappa-B kinase subunit beta           | IKBKB       | Q95KV0    | 0,01        |
| Interferon regulatory factor 3                                    | IRF3        | Q4JF28    | 0,01        |
| Thioredoxin, mitochondrial                                        | TXN2        | Q95108    | 0,01        |
| Rab GTPase-binding effector protein 2                             | RABEP2      | A4FUG8    | 0,01        |
| Endonuclease G, mitochondrial                                     | ENDOG       | P38447    | 0,01        |
| Differentially expressed in FDCP 8 homolog                        | DEF8        | A5PJM7    | 0,01        |
| Activator of 90 kDa heat shock protein ATPase homolog 2           | AHSA2       | A6QQC0    | 0,01        |
