# Supplementary material
Source: PubMed Central journal article supplement (PMC7265823)
Supplement: mmc2.pdf [file mmc2.pdf]

**Supplemental Table 2.** Downregulated protein expression in BRSV-infected bBECs

| Description                                                              | Gene Symbol | Accession | Fold change |
|--------------------------------------------------------------------------|-------------|-----------|-------------|
| 3-ketodihydrosphingosine reductase                                       | KDSR        | Q2KIJ5    | 0,538       |
| Rho-associated protein kinase 2                                          | ROCK2       | M3TYT0    | 0,512       |
| Brain acid soluble protein 1                                             | BASP1       | P80724    | 0,506       |
| Intercellular adhesion molecule 1                                        | ICAM1       | Q95132    | 0,445       |
| Receptor-type tyrosine-protein phosphatase F                             | PTPRF       | A7MBJ4    | 0,437       |
| Apolipoprotein A-II                                                      | APOA2       | P81644    | 0,407       |
| GPI transamidase component PIG-S                                         | PIGS        | Q3SZL5    | 0,397       |
| WD repeat-containing protein 18                                          | WDR18       | Q3SZD4    | 0,136       |
| Testis-specific serine/threonine-protein kinase 1                        | TSSK1B      | Q3SZW1    | 0,126       |
| Alpha-1-acid glycoprotein                                                | ORM1        | Q3SZR3    | 0,109       |
| Vitamin D-binding protein                                                | GC          | Q3MHN5    | 0,107       |
| Fetuin-B                                                                 | FETUB       | Q58D62    | 0,106       |
| Hemoglobin subunit alpha                                                 | HBA1        | P01966    | 0,105       |
| Apolipoprotein A-I                                                       | APOA1       | P15497    | 0,102       |
| Alpha-2-HS-glycoprotein                                                  | AHSG        | P12763    | 0,081       |
| Alpha-fetoprotein                                                        | AFP         | Q3SZ57    | 0,064       |
| Serum albumin                                                            | ALB         | P02769    | 0,058       |
| Alpha-1-antitrypsin                                                      | SERPINA1    | P34955    | 0,056       |
| Elongation factor Ts, mitochondrial                                      | TSMF        | P43896    | 0,01        |
| Alpha-1,3-mannosyl-glycoprotein 4-beta-N-acetylglucosaminyltransferase C | MGAT4C      | Q6ITT3    | 0,01        |
| Annexin A2                                                               | ANXA2       | P19620    | 0,01        |
| Serpin A3-2                                                              | SERPINA3-2  | A2I7M9    | 0,01        |
| Signal recognition particle 19 kDa protein                               | SRP19       | Q3ZBG7    | 0,01        |
| Adenylyltransferase and sulfurtransferase MOCS3                          | MOCS3       | A1A4L8    | 0,01        |
| Zinc finger CCCH domain-containing protein 15                            | ZC3H15      | Q1RMM1    | 0,01        |
| Biogenesis of lysosome-related organelles complex 1 subunit 6            | BLOC1S6     | Q08DU8    | 0,01        |
| Serotransferrin                                                          | TF          | Q29443    | 0,01        |
| Pigment epithelium-derived factor                                        | SERPINF1    | Q95121    | 0,01        |
| 28S ribosomal protein S29, mitochondrial                                 | DAP3        | P82922    | 0,01        |
| Hemoglobin fetal subunit beta                                            | HBG         | P02081    | 0,01        |
| Transthyretin                                                            | TTR         | O46375    | 0,01        |
| Signal transducer and activator of transcription 3                       | STAT3       | Q19S50    | 0,01        |
