# Supplementary material
Source: PubMed Central journal article supplement (PMC7265823)
Supplement: mmc3.pdf [file mmc3.pdf]

**Supplemental Table 3.** Downregulated protein expression in BRSV-infected bLECs

| Description                                                    | Gene Symbol | Accession | Fold change |
|----------------------------------------------------------------|-------------|-----------|-------------|
| Tumor necrosis factor alpha-induced protein 8                  | TNFAIP8     | A4IF78    | 0,597       |
| Medium-chain specific acyl-CoA dehydrogenase, mitochondrial    | ACADM       | Q3SZB4    | 0,589       |
| Dr1-associated corepressor                                     | DRAP1       | Q2YDP3    | 0,574       |
| Apolipoprotein A-II                                            | APOA2       | P81644    | 0,573       |
| CXXC motif containing zinc binding protein                     | CZIB        | Q32P66    | 0,533       |
| gamma-glutamylcyclotransferase                                 | GGCT        | Q32LE4    | 0,528       |
| Thioredoxin domain-containing protein 12                       | TXNDC12     | Q5E936    | 0,486       |
| Importin-13                                                    | IPO13       | A7YWD2    | 0,456       |
| RNA-binding protein 4                                          | RBM4        | Q3MHX3    | 0,424       |
| 28S ribosomal protein S28, mitochondrial                       | MRPS28      | P82928    | 0,406       |
| Inhibin beta A chain                                           | INHBA       | Q6X2S4    | 0,304       |
| Cytochrome c oxidase subunit 6A1, mitochondrial                | COX6A1      | P13182    | 0,279       |
| Prefoldin subunit 5                                            | PFDN5       | Q8HYI9    | 0,171       |
| Transforming growth factor beta-1-induced transcript 1 protein | TGFB111     | Q3MHZ4    | 0,01        |
| Programmed cell death protein 5                                | PDCD5       | Q2HJH9    | 0,01        |
| Elongation of very long chain fatty acids protein 7            | ELOVL7      | A0JNC4    | 0,01        |
| Protein FAM177A1                                               | FAM177A1    | A6QLZ5    | 0,01        |
| Ras-related protein Rab-8B                                     | RAB8B       | Q2HJI8    | 0,01        |
| Guanidinoacetate N-methyltransferase                           | GAMT        | Q2TBQ3    | 0,01        |
| Prefoldin subunit 3                                            | VBP1        | Q2TBX2    | 0,01        |
| Sorting nexin-1                                                | SNX1        | Q05B62    | 0,01        |
| Leucine zipper transcription factor-like protein 1             | LZTFL1      | Q3ZBL4    | 0,01        |
| Parathyrosin                                                   | PTMS        | P08814    | 0,01        |
| Acyl-CoA-binding domain-containing protein 5                   | ACBD5       | P07106    | 0,01        |
