# Supplementary material
Source: PubMed Central journal article supplement (PMC7265823)

Supplemental Figure 1.

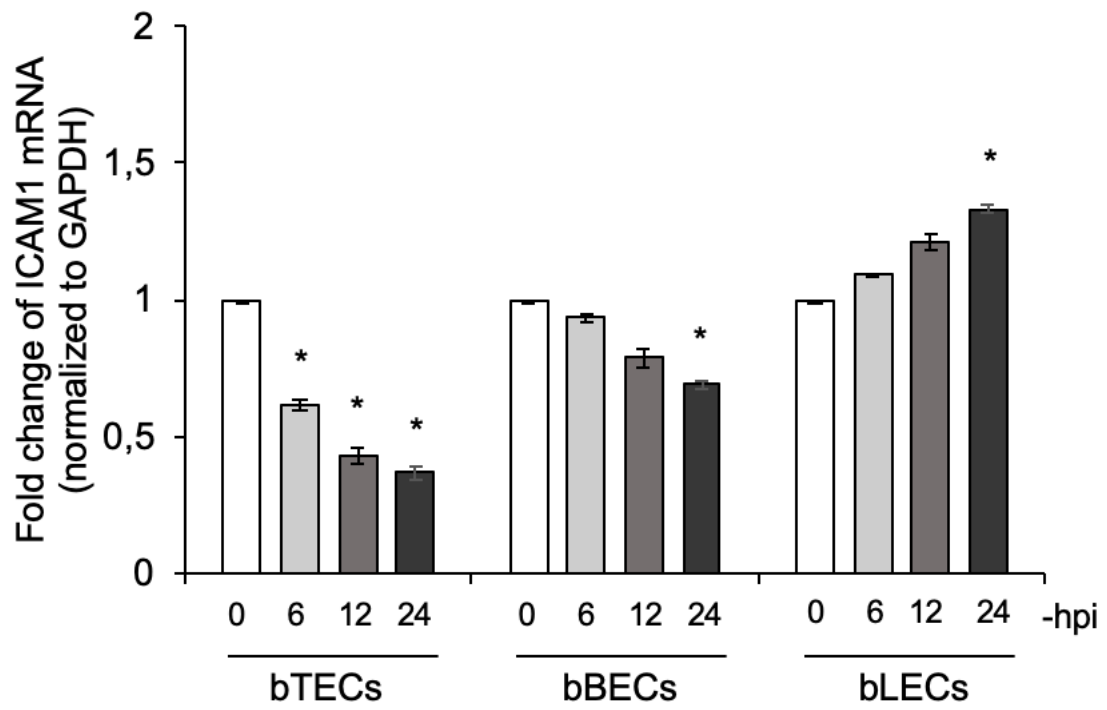

Supplement: mmc5.pdf [file mmc5.pdf]
